# Supplementary material for: Shape-controlled MnO2 as a sulfur host for high performance lithium–sulfur batteries
Source: Royal Society of Chemistry journal article supplement (doi:10.1039/d0nj02306j), 2020-01-01
Supplement: d0nj02306j1.pdf [file d0nj02306j1.pdf]

## Shape-controlled MnO<sub>2</sub> as sulfur host for high performance

### Lithium-Sulfur Batteries

You Ge<sup>#</sup>, Ping Chen<sup>#</sup>, Wenjing Zhang<sup>#</sup>, Qi Shan, Yanan Fang, Ningna Chen, Zhangyu Yuan, Yanzheng Zhang, and Xiaomiao Feng<sup>\*</sup>

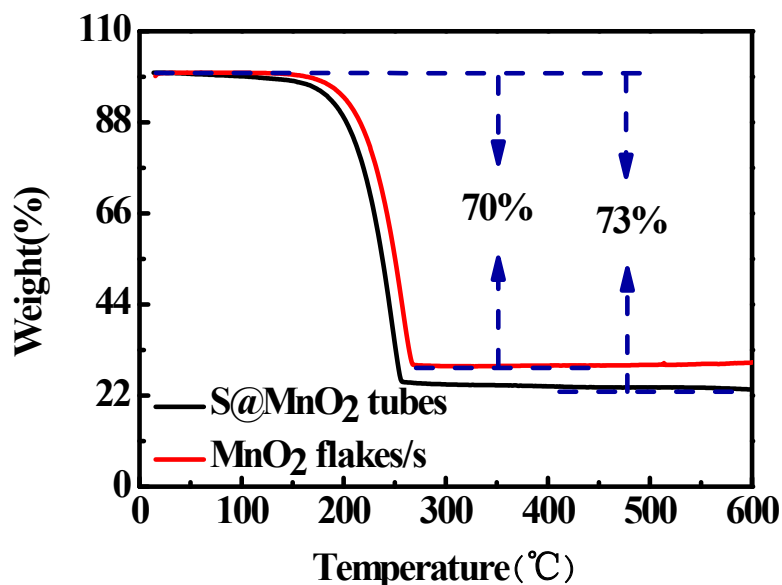

Fig.S1 The thermal gravimetric analysis (TGA) curves of the MnO<sub>2</sub> flakes/S and MnO<sub>2</sub> tubes/S.

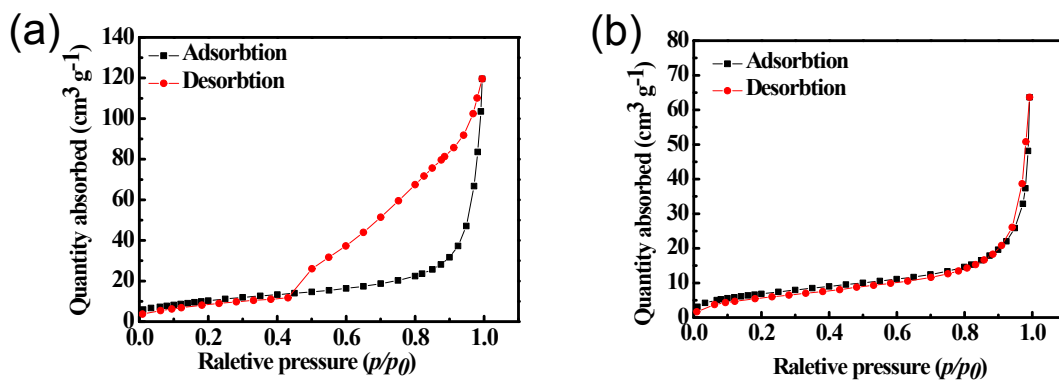

Fig.S2 BET surface area analysis of (a) MnO<sub>2</sub> flakes and (b) MnO<sub>2</sub> tubes.

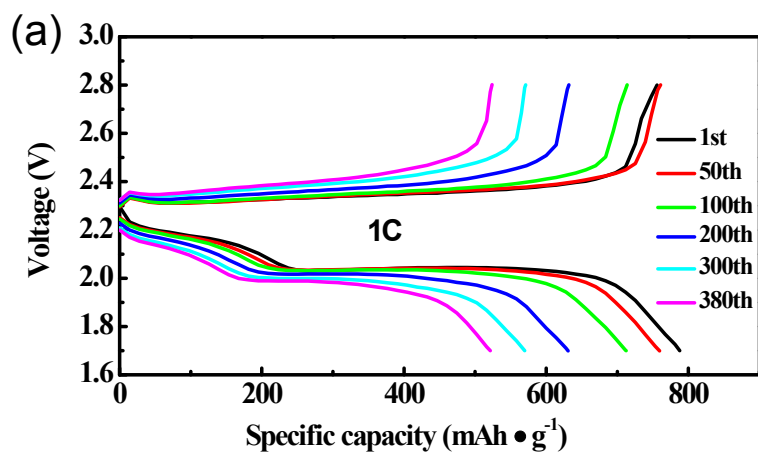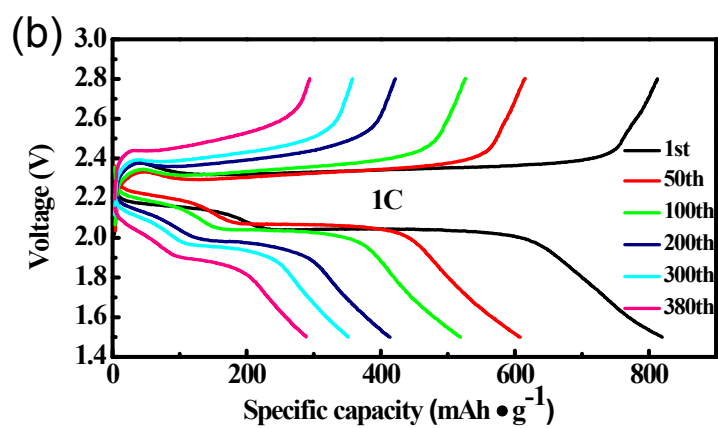

Fig.S3 The discharge/charge voltage profiles of (a)  $\text{MnO}_2$  flakes/S and (b)  $\text{MnO}_2$  tubes/S electrodes with increasing cycles at 1.0C

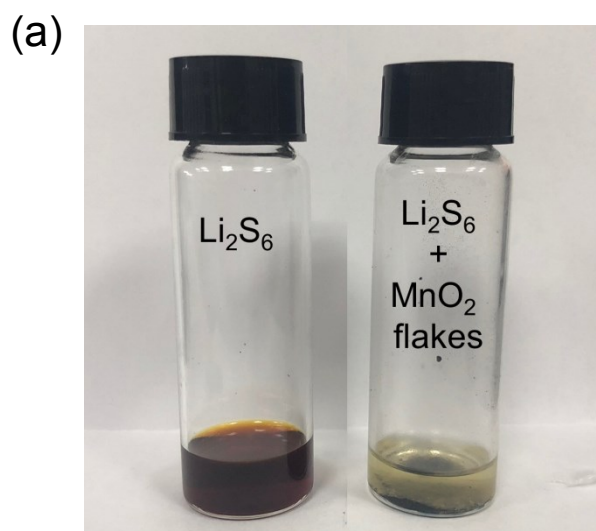

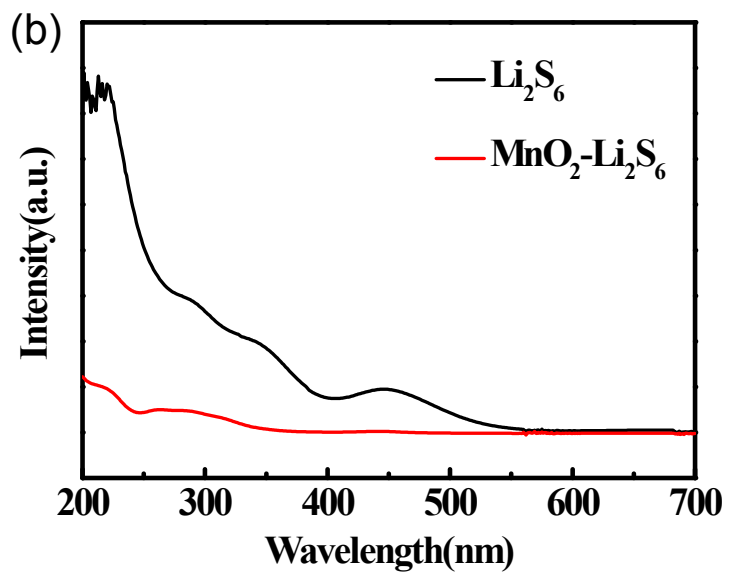

Fig.S4 (a) Digital photographs of  $\text{Li}_2\text{S}_6$  and  $\text{Li}_2\text{S}_6$  solution with  $\text{MnO}_2$  flakes; (b) UV-Vis spectra of  $\text{Li}_2\text{S}_6$  solution and the  $\text{Li}_2\text{S}_6\text{-MnO}_2$  flakes.
